# Supplementary material
Source: PubMed Central journal article supplement (PMC2844147)
Supplement: supp_M109.065987_jbc.M109.065987-1.pdf [file supp_M109.065987_jbc.M109.065987-1.pdf]

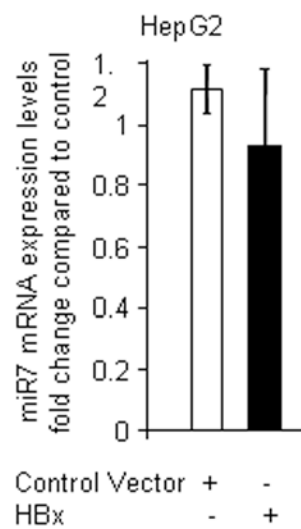

**Supplementary Figure S1.** Transcriptional levels of miR-7 and in HepG2 expressing HBx and control were quantified by real time PCR. U6 RNA was used as an internal control for miR-661 quantification.

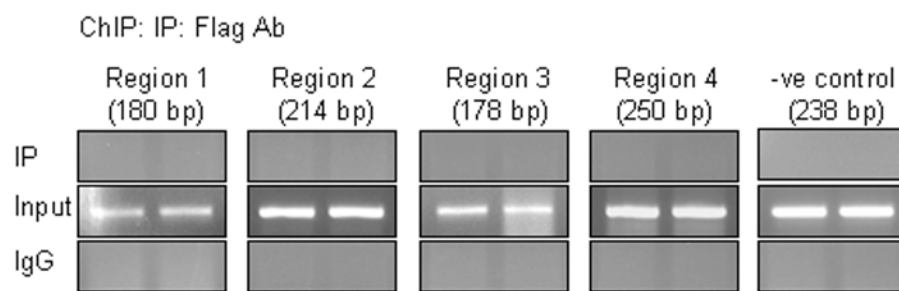

**Supplementary Figure S2.** Recruitment of HBx to *miR-667*-chromatin (R1-4) by ChIP assay in HepG2 cells after transfecting with either pCMV vector control or pCMV-HBx. Random region was used as a negative control for the study.

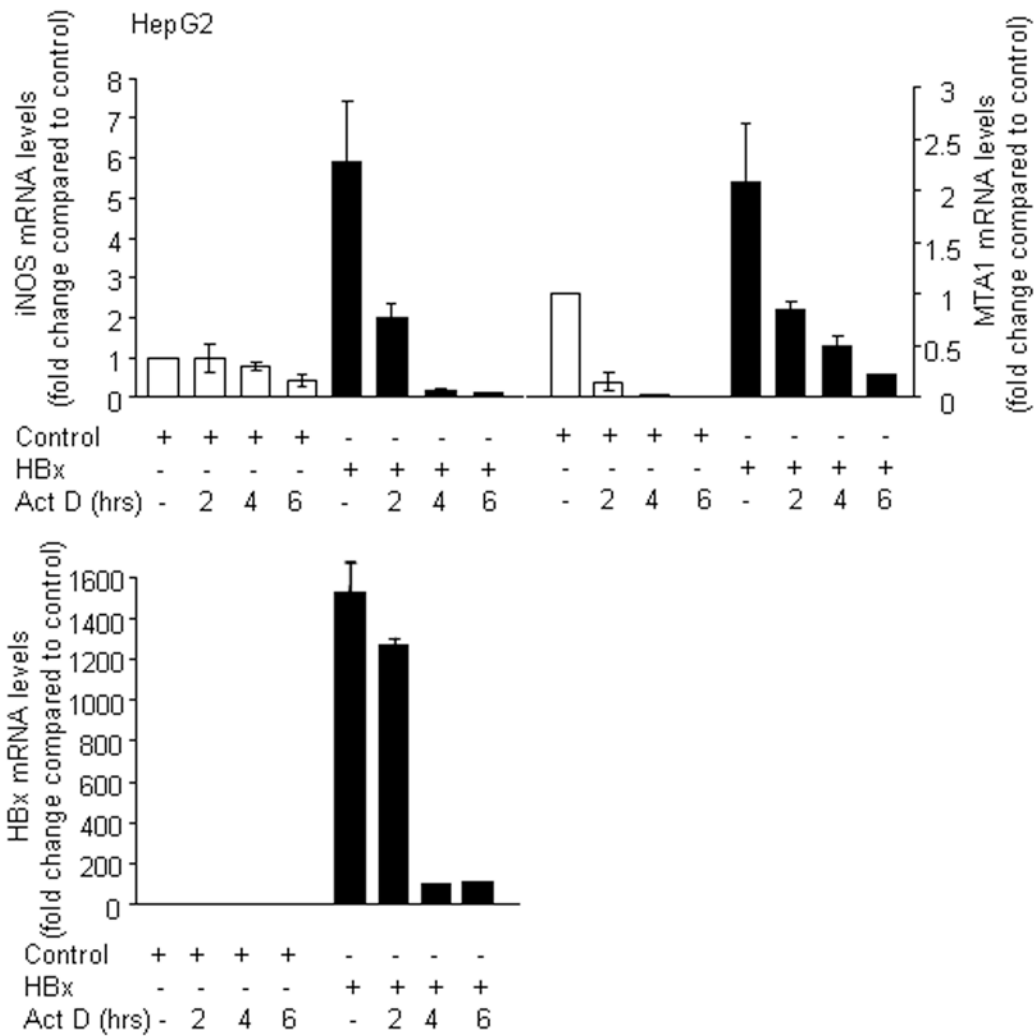

**Supplementary Figure S3. A.** qPCR analysis of iNOS, MTA 1, and HBx mRNAs in HBx expressing HepG2 cells or control transfected HepG2 cells with or without Actinomycin D (5  $\mu$ g/ml) for the indicated amount of time exposure.

**Table 1****Primer sets for ChIP and EMSA**

| <b>Primer for ChIP</b>        |                                     |
|-------------------------------|-------------------------------------|
| <b>Set 1 (-102 to -119)</b>   | <b>PCR product (-1 to -246)</b>     |
| hiNOS ChIP FP1                | ACCTTGGA CT TGGG ACCAGAAAGA         |
| hiNOS ChIP RP1                | GAACACACTGGCAGCCAAGAAGTA            |
| <b>Set 2 (-5.5kb)</b>         | <b>PCR product (-5344 to -5593)</b> |
| hiNOS ChIP FP2                | TATAGTACTTTTACCAGCTGCCTC            |
| hiNOS ChIP RP2                | AAAAGCCTCGTTTCTTG TCAA              |
| <b>Set 3 (-5.8)</b>           | <b>PCR product (-5707 to -5941)</b> |
| hiNOS ChIP FP3                | AGCATCCAGCACCCCTCAGAGGCTGT          |
| hiNOS ChIP RP3                | ACCCAGCAGTTCCAGAGCATCACT            |
| <b>Set 4 (-6.1)</b>           | <b>PCR product (-6010 to -6223)</b> |
| hiNOS ChIP FP4                | TCAGGCTCTGCAGAAGTTGCCAGT            |
| hiNOS ChIP RP4                | GCTGCATCTTTGGTTAGGCCACATAA          |
| <b>Set 5 (-8287 to -8270)</b> | <b>PCR product (-8100 to -8296)</b> |
| hiNOS ChIP FP5                | CCCGGGAGCCCTGGGGAACTCCT             |
| hiNOS ChIP RP5                | ATCTTAGGGACACCACCGGTCTGA            |
